# Supplementary material for: Recognition of silver cations by a cucurbit[8]uril-induced supramolecular crown ether
Source: Royal Society of Chemistry journal article supplement (doi:10.1039/c5ob02590g), 2016-01-01
Supplement: c5ob02590g1.pdf [file c5ob02590g1.pdf]

## Supporting Information

### Recognition of Silver Cations by a Cucurbit[8]uril-induced

### Supramolecular Crown Ether

Qing-Xia Geng,<sup>a</sup> Fang Wang,<sup>a</sup> Hang Cong,<sup>\*a</sup> Zhu Tao,<sup>a</sup> and Gang Wei,<sup>\*a</sup>

<sup>a</sup>Key Laboratory of Macrocyclic and Supramolecular Chemistry of Guizhou Province, Guizhou University, Guiyang 550025, P.R. China

<sup>b</sup>CSIRO Manufacturing Flagship, P.O. Box 218, Lindfield, NSW 2070, Australia.

|                                                                                                                                                                       |    |
|-----------------------------------------------------------------------------------------------------------------------------------------------------------------------|----|
| Title, authors and description of supporting information contents.....                                                                                                | 1  |
| Fig.S1 Non-linear fitting of the absorption data for Q[8] with <b>guest 3</b> .....                                                                                   | 2  |
| Fig.S2 Job plots of the host-guest interaction between <b>guest 3</b> and Q[8] in aqueous solution...3                                                                |    |
| Fig.S3 TOF-MS of the inclusion complex of Q[8] with <b>guest 3</b> .....                                                                                              | 4  |
| Fig S4 Job plots of coordination of the interaction complex of Q[8]- <b>3</b> with Ag <sup>+</sup> .....                                                              | 5  |
| Fig S5 The IR spectra of Q[8], free guest, inclusion complex, and the coordination compounds ...6                                                                     |    |
| Fig.S6 Non-linear fitting curve for changes in the absorption intensity of the inclusion complex in the presence of different concentrations of Ag <sup>+</sup> ..... | 7  |
| Fig.S7 Linear dynamic response of the inclusion complex of Q[8] with <b>guest 3</b> to Ag <sup>+</sup> .....                                                          | 8  |
| Fig.S8 <sup>1</sup> H, <sup>13</sup> C NMR spectra of <b>compound 1</b> .....                                                                                         | 9  |
| Fig.S9 Mass spectra of <b>compound 1</b> .....                                                                                                                        | 10 |
| Fig. S10 <sup>1</sup> H, <sup>13</sup> C NMR spectra of <b>compound 2</b> .....                                                                                       | 11 |
| Fig.S11 Mass spectra of <b>compound 2</b> .....                                                                                                                       | 12 |
| Fig.S12 <sup>1</sup> H, <sup>13</sup> C NMR spectra of <b>compound 3</b> .....                                                                                        | 13 |
| Fig.S13 Mass spectra of <b>compound 3</b> .....                                                                                                                       | 14 |

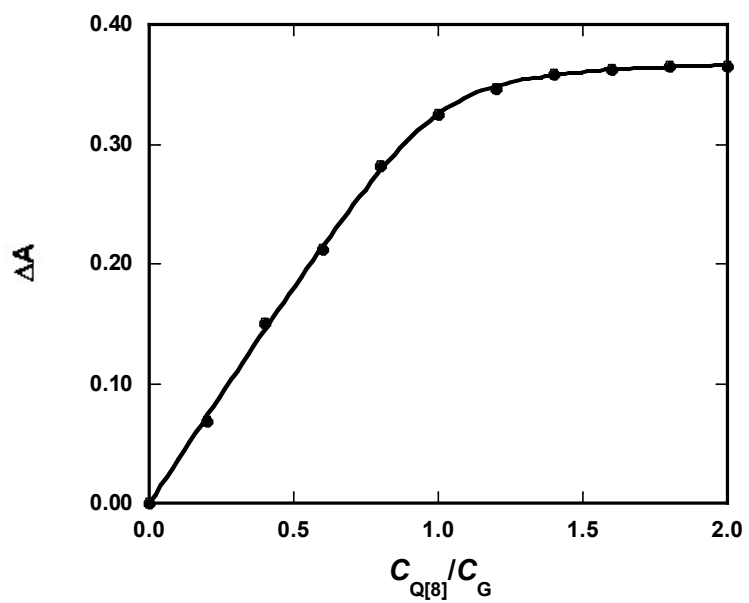

**Fig. S1** Non-linear fitting of the absorption data for Q[8] with guest **3**.

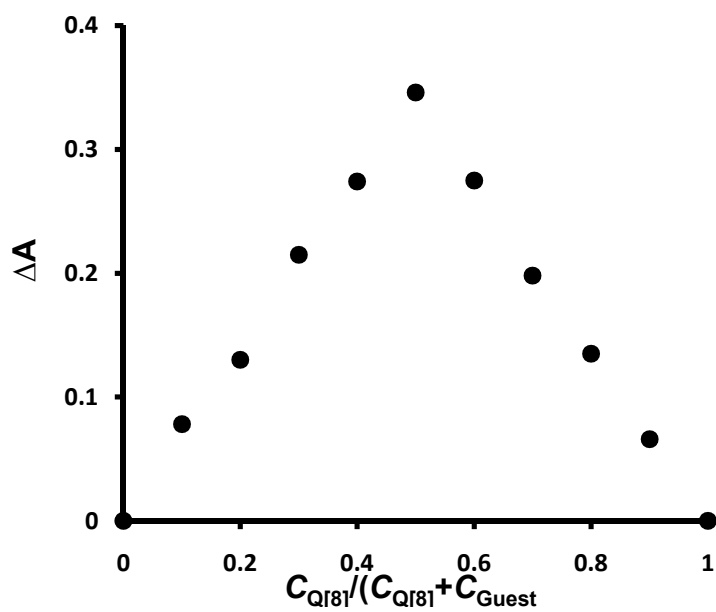

**Fig. S2** Job plot of the host–guest interaction between **guest 3** and Q[8] in aqueous solution. The total concentration of the reactants is  $1.0 \times 10^{-4} \text{ mol} \cdot \text{L}^{-1}$  ( $\lambda = 266 \text{ nm}$ ).

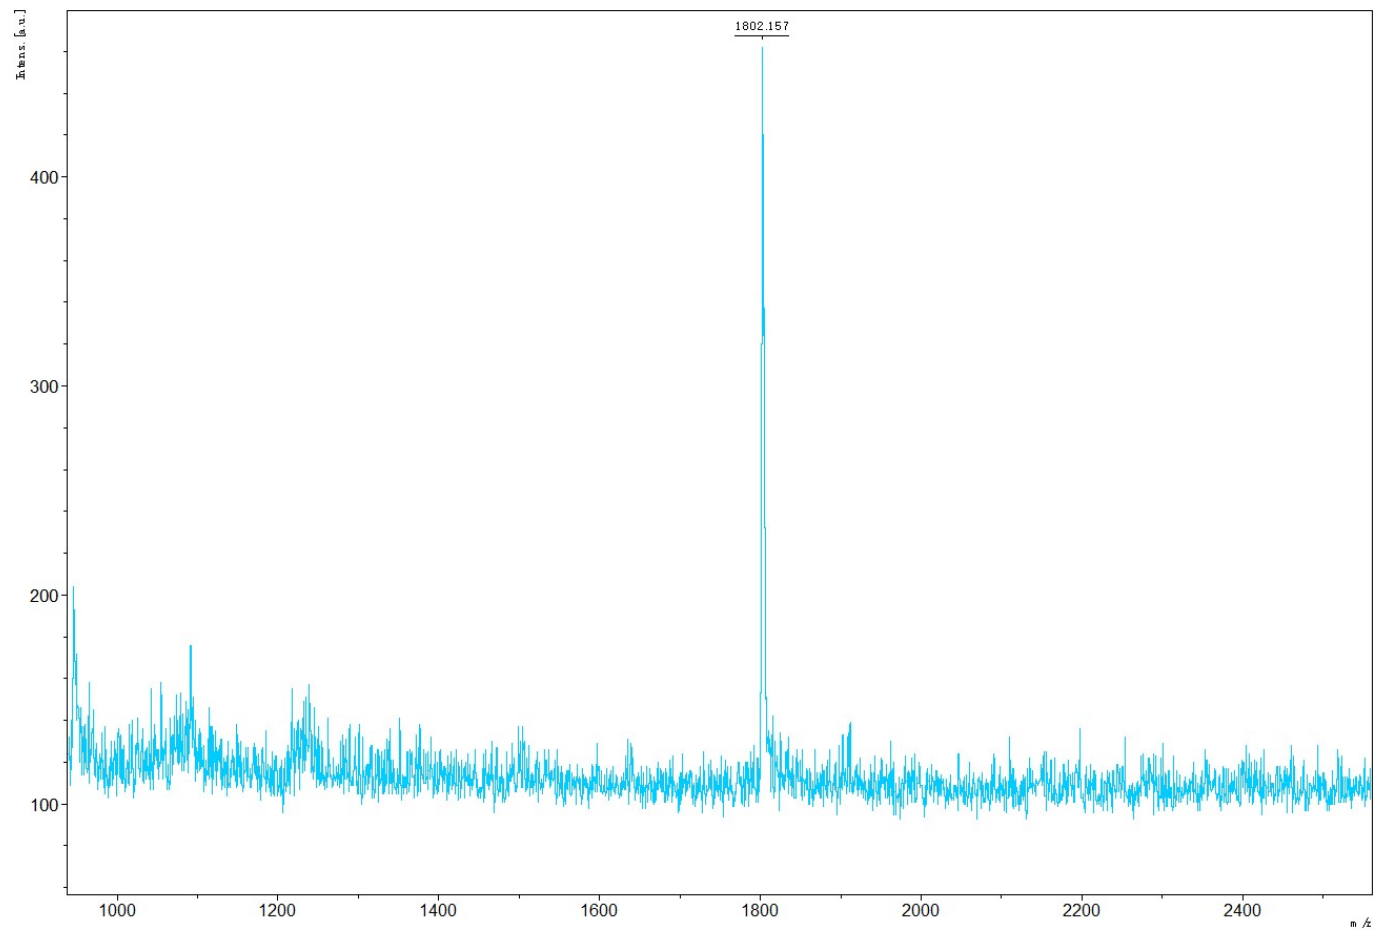

**Fig. S3** TOF-MS of the inclusion complex of Q[8] with guest **3**.

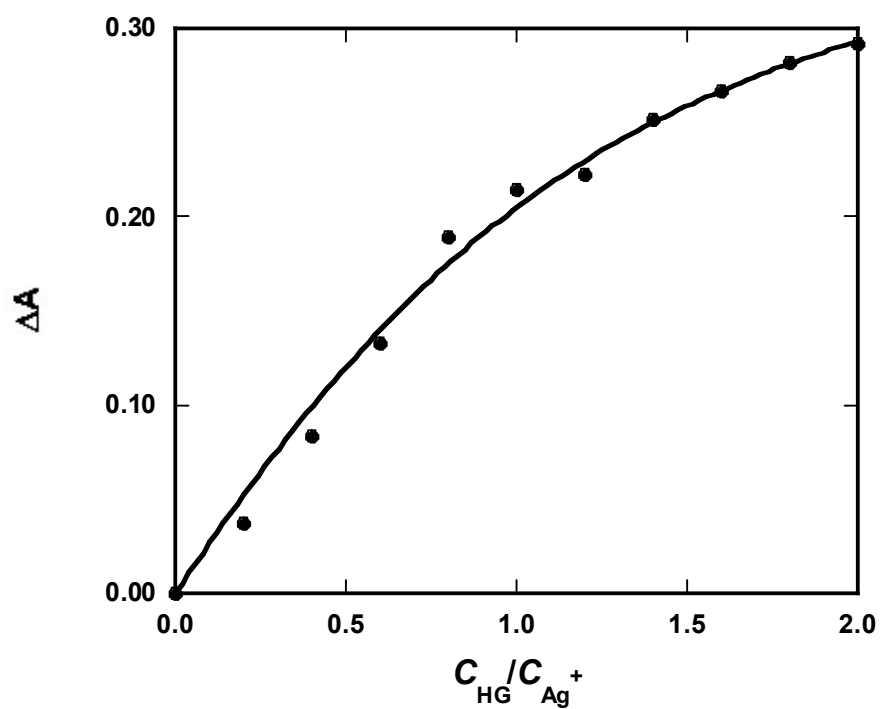

**Fig. S4** Non-linear fitting curve for changes in the absorption intensity of the inclusion complex in the presence of different concentrations of  $Ag^+$  ( $\lambda = 266$  nm).

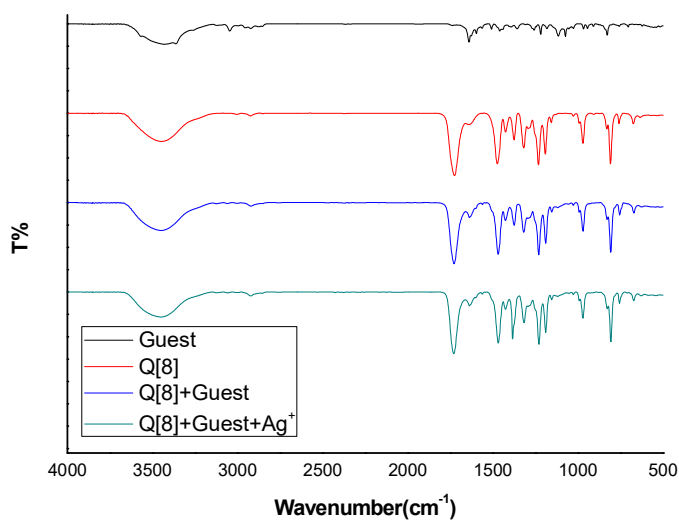

**Fig. S5** IR spectra of free Guest, free Q[8], inclusion complex (Q[8]+Guest) and the complex formed by the inclusion complex and Ag<sup>+</sup> (Q[8]+Guest+Ag<sup>+</sup>).

The IR spectra were recorded on a Bruker Vertex 70 FT-IR spectrophotometer using KBr pellets. The inclusion complex was prepared by stirring the mixture solution of Q[8] with the guest in H<sub>2</sub>O in a ratio of 1:1, and then the solvent was removed in vacuum to get the solid inclusion complex. And the same way is used to deal with the coordination compound which was formed by the inclusion complex and 1 equiv. Ag<sup>+</sup>.

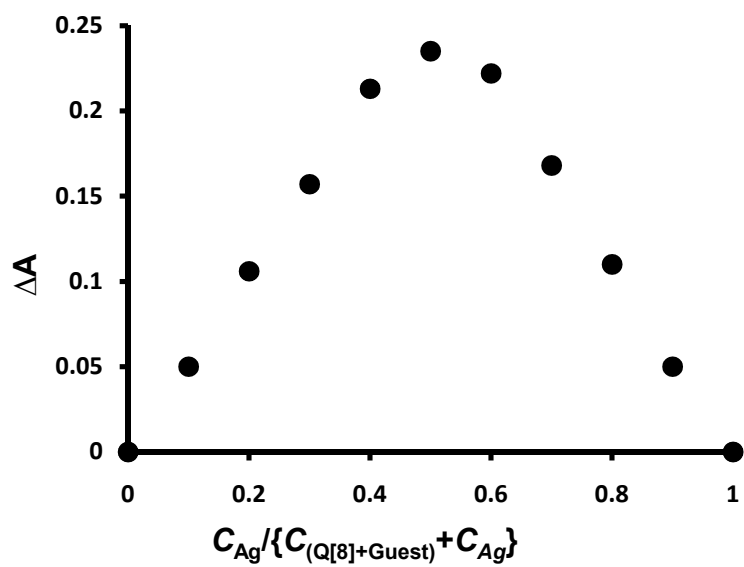

**Fig. S6** Job plot of the interaction between the guest complex with Q[8] and  $Ag^+$  in aqueous solution. The total concentration of the reactants is  $1.0 \times 10^{-4} \text{ mol} \cdot \text{L}^{-1}$  ( $\lambda = 266 \text{ nm}$ ).

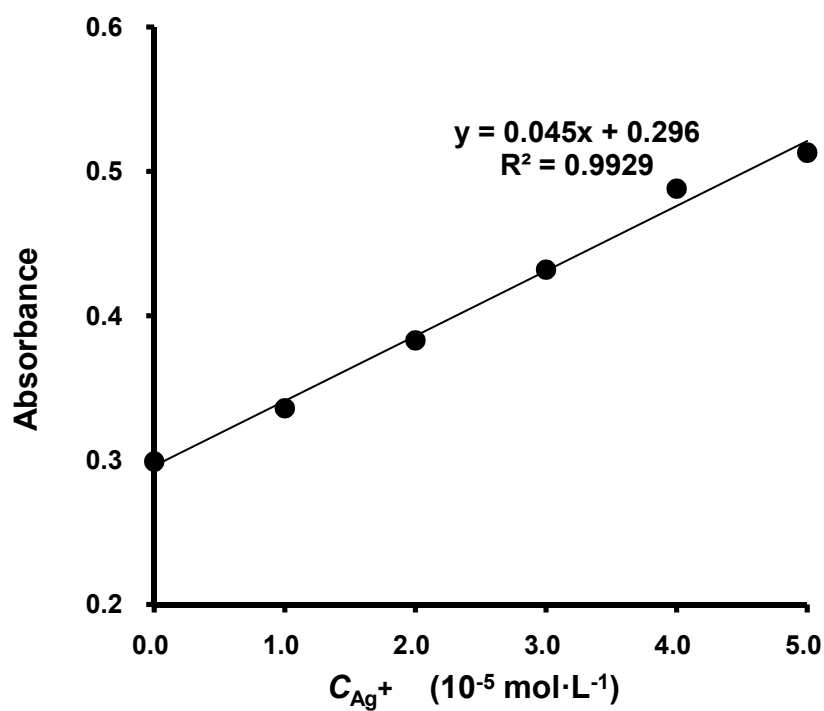

**Fig. S7** Linear dynamic response of the inclusion complex of Q[8] with guest **3** to  $Ag^+$ .



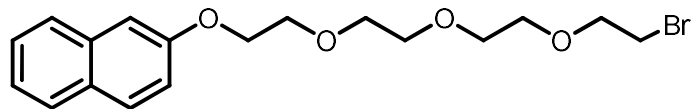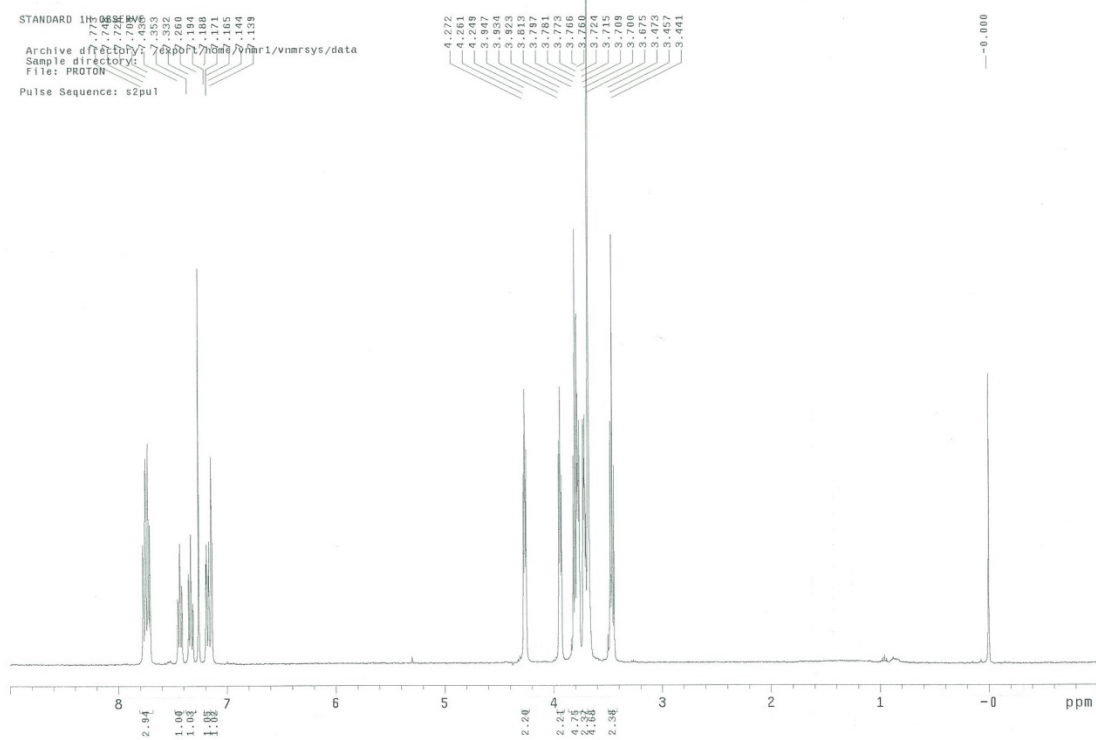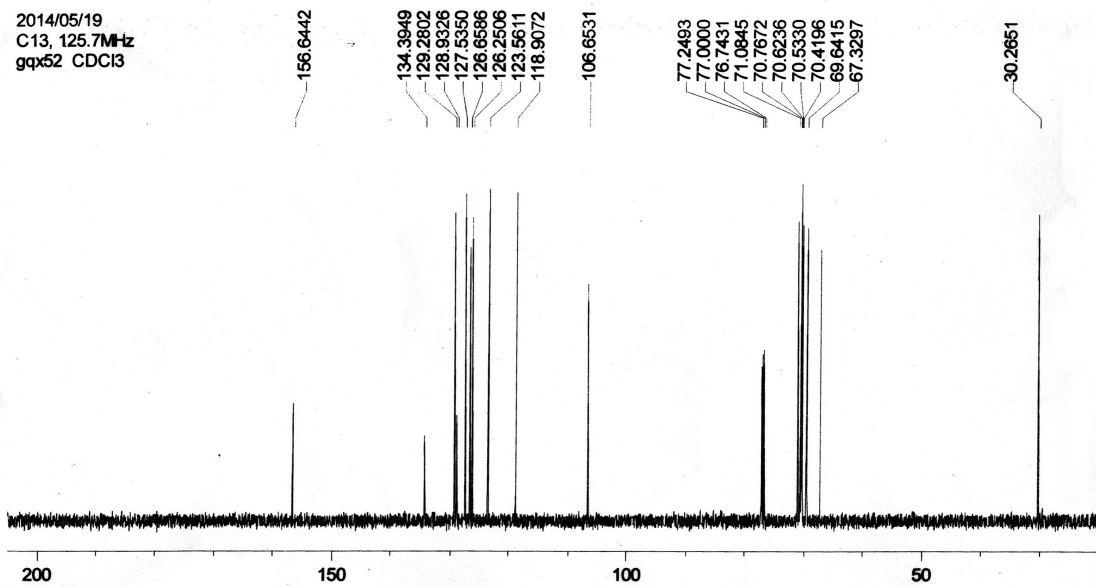

Fig. S8  $^1\text{H}$  and  $^{13}\text{C}$  NMR spectra of compound 1.

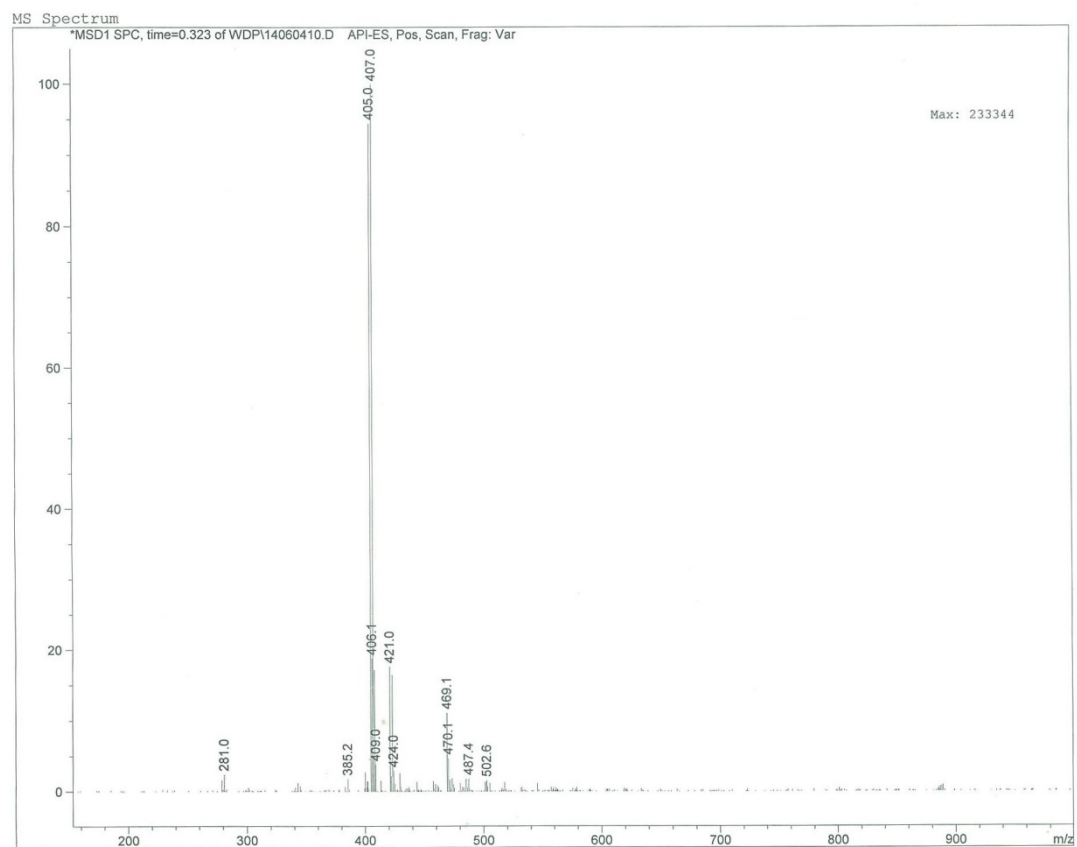

**Fig. S9** ESI-MS spectrum of **compound 1**.

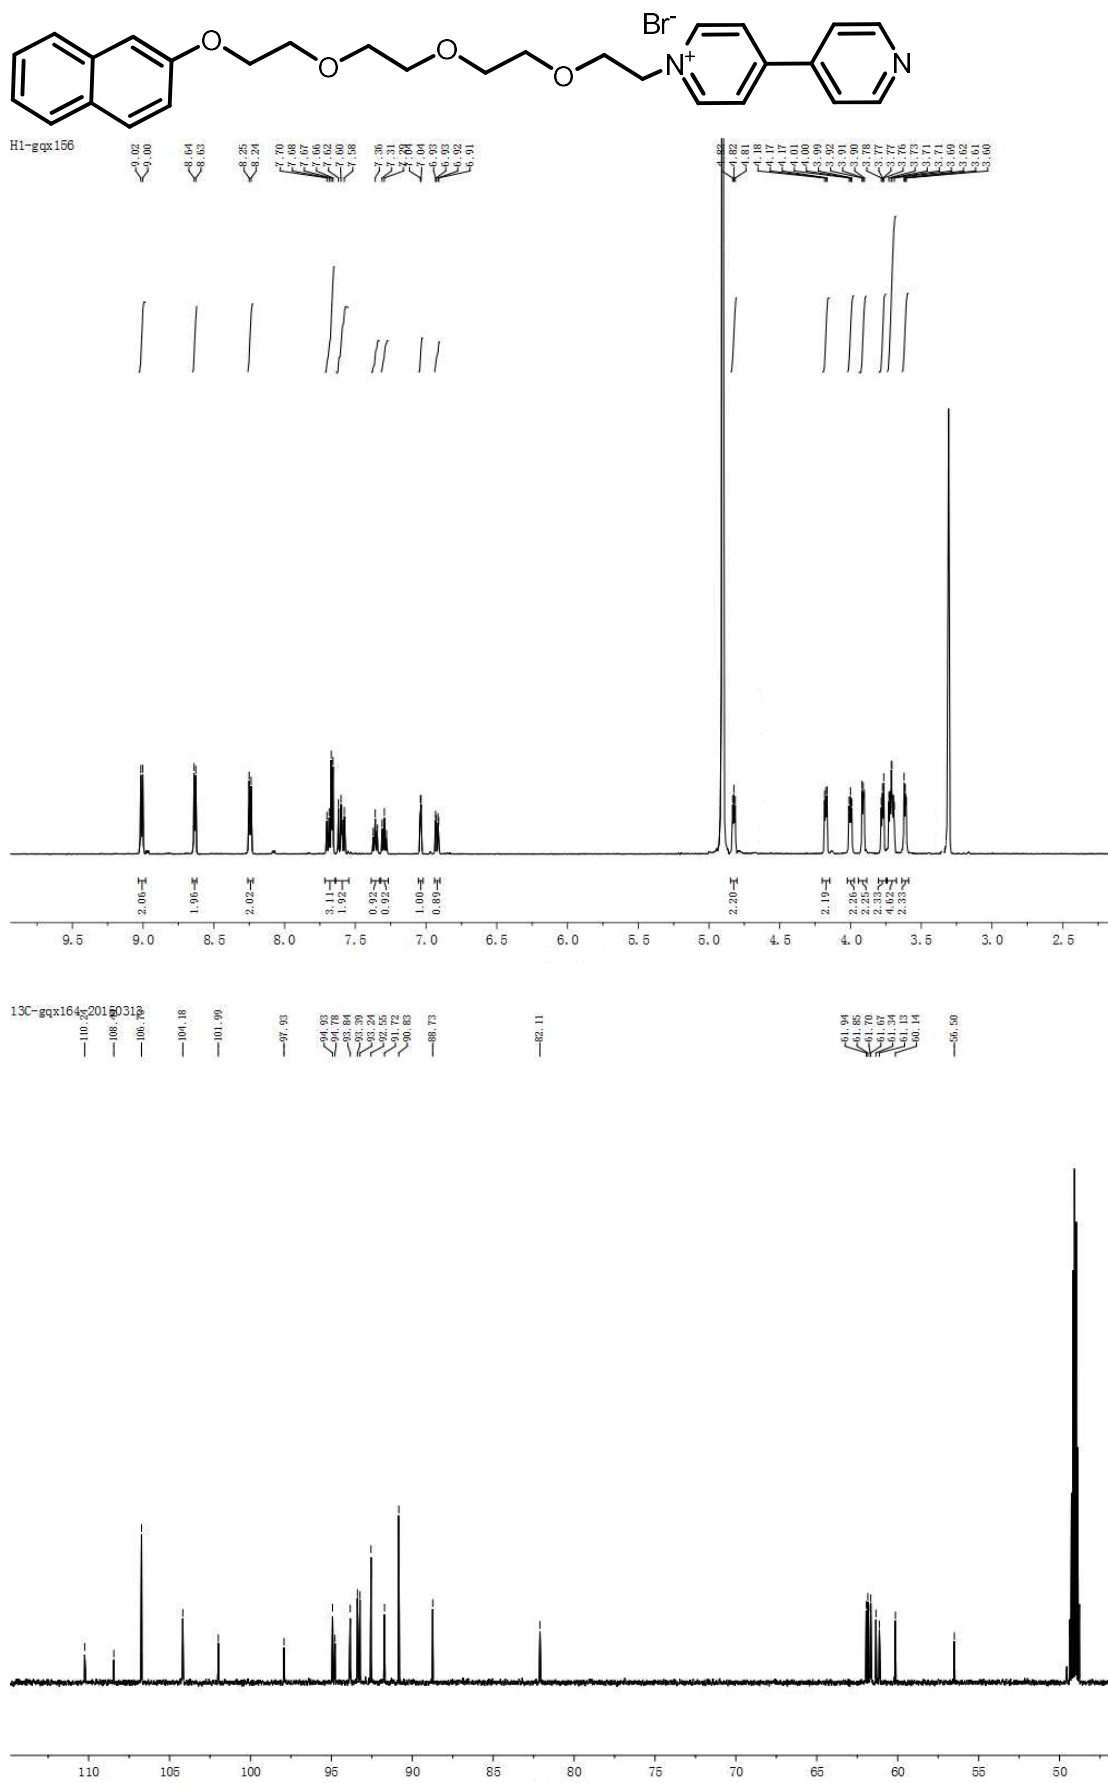

**Fig. S10** <sup>1</sup>H and <sup>13</sup>C NMR spectra of **compound 2**.

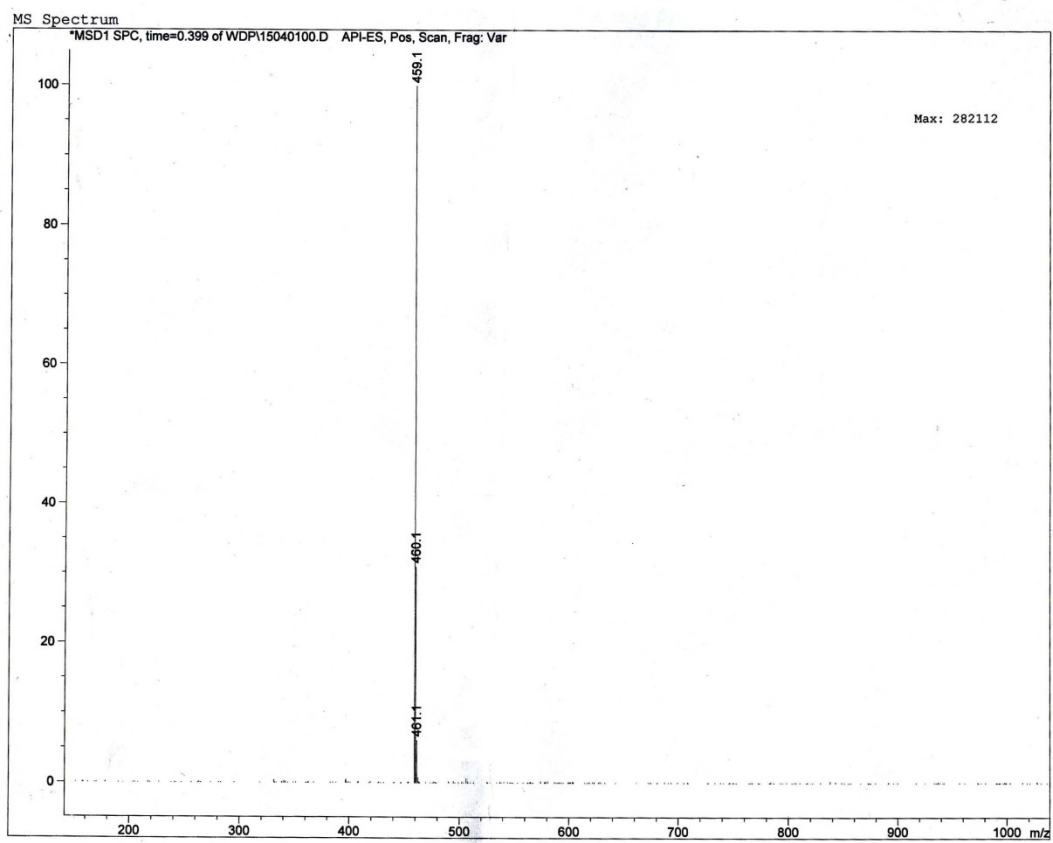

**Fig. S11** ESI-MS spectrum of **compound 2**.



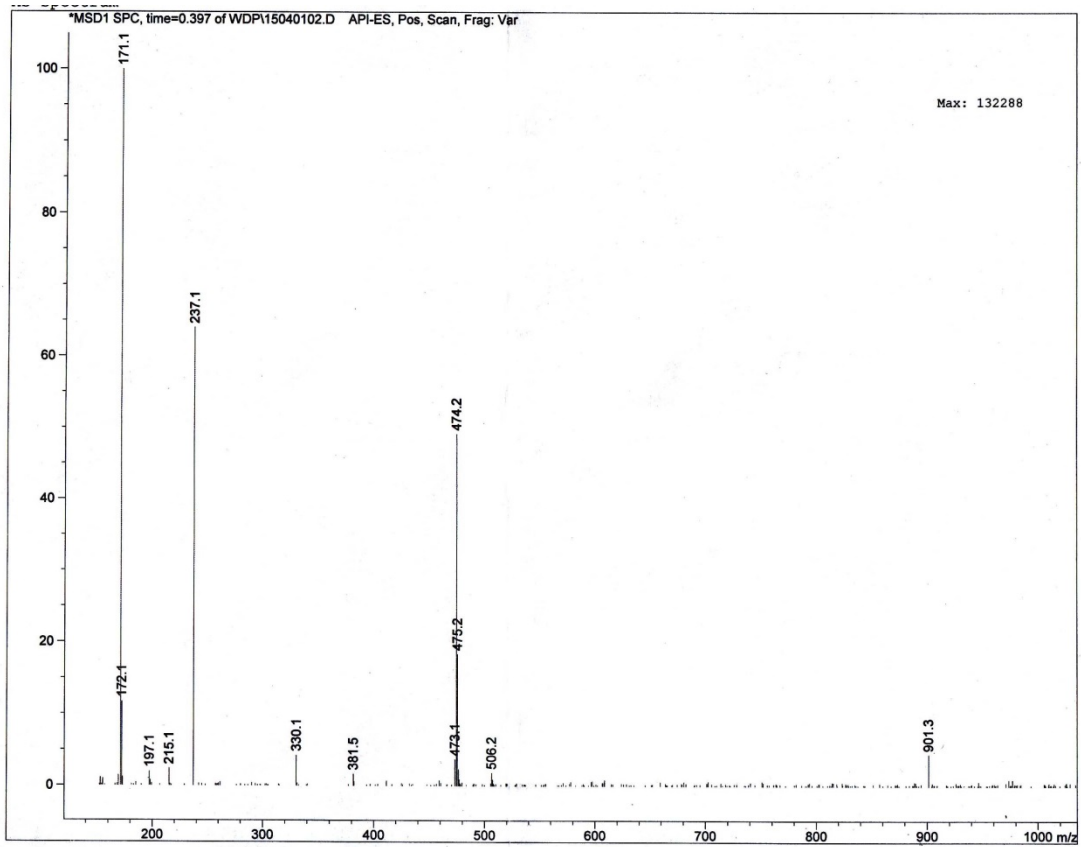

**Fig. S13** ESI-MS spectrum of **compound 3**.
